# Supplementary material for: Electron Paramagnetic Resonance Spectra of Pentagonal Bipyramidal Gadolinium Complexes
Source: PubMed Central journal article supplement (PMC10230502; doi:10.1021/acs.inorgchem.3c01227), 2023-05-12
Supplement: ic3c01227_si_001.pdf [file ic3c01227_si_001.pdf]

## Supporting information

### **Electron Paramagnetic Resonance Spectra of Pentagonal Bipyramidal Gadolinium Complexes**

Jonatan B. Petersen,<sup>1</sup> You-Song Ding,<sup>1,2</sup> Sandeep K. Gupta,<sup>3</sup> Aditya Borah,<sup>3</sup> Eric J. L. McInnes,<sup>1</sup> Yan-Zhen Zheng,<sup>2</sup> Ramaswamy Murugavel,<sup>3</sup> and Richard E. P. Winpenny<sup>1\*</sup>

<sup>1</sup> Department of Chemistry, School of Natural Science, The University of Manchester, Oxford Road, Manchester M13 9PL, United Kingdom

<sup>2</sup>Frontier Institute of Science and Technology (FIST), Xi'an Jiaotong University, 99 Yanxiang Road, Xi'an 710049, China

<sup>3</sup> Department of Chemistry, Indian Institute of Technology Bombay, Mumbai-400076, India

## Crystallography

**Table S1.** Crystallographic and refinement parameters for compounds **1 - 5**

|                                            | [YCl <sub>2</sub> (Py) <sub>5</sub> ]<br>BPh <sub>4</sub> ·THF<br>( <b>1</b> ) | YCl <sub>2</sub> (THF) <sub>5</sub><br>BPh <sub>4</sub> ·0.5THF<br>( <b>2</b> ) | [Y(O <sup>t</sup> Bu)Cl(THF) <sub>5</sub> ]BPh <sub>4</sub> ·<br>2THF<br>( <b>3</b> ) |
|--------------------------------------------|--------------------------------------------------------------------------------|---------------------------------------------------------------------------------|---------------------------------------------------------------------------------------|
| Reference                                  | This work                                                                      | This work                                                                       | 1,2                                                                                   |
| Sum formula                                | C <sub>49</sub> H <sub>45</sub> BCl <sub>2</sub> N <sub>5</sub> Y              | C <sub>46</sub> H <sub>64</sub> BC <sub>2</sub> O <sub>5.5</sub> Y              | YC <sub>56</sub> H <sub>85</sub> BClO <sub>8</sub>                                    |
| Formula weight (g/mol)                     | 874.5                                                                          | 875.59                                                                          | 1021.4                                                                                |
| Crystal system                             | Orthorhombic                                                                   | Triclinic                                                                       | Monoclinic                                                                            |
| Space group                                | <i>Pca</i> 2 <sub>1</sub>                                                      | <i>P</i> $\bar{1}$                                                              | <i>P</i> 2 <sub>1</sub> / <i>n</i>                                                    |
| <i>T</i> (K)                               | 150                                                                            | 150                                                                             | 100                                                                                   |
| <i>a</i> (Å)                               | 19.8587(16)                                                                    | 12.5396(6)                                                                      | 13.6356(17)                                                                           |
| <i>b</i> (Å)                               | 12.5584(10)                                                                    | 12.7786(6)                                                                      | 12.4340(15)                                                                           |
| <i>c</i> (Å)                               | 18.0227(17)                                                                    | 29.3605(15)                                                                     | 32.618(4)                                                                             |
| $\alpha$ (°)                               | 90                                                                             | 79.595(4)                                                                       | 90                                                                                    |
| $\beta$ (°)                                | 90                                                                             | 79.953(4)                                                                       | 90.434(2)                                                                             |
| $\gamma$ (°)                               | 90                                                                             | 82.294(4)                                                                       | 90                                                                                    |
| <i>V</i> (Å <sup>3</sup> )                 | 4494.7(7)                                                                      | 4528.2(4)                                                                       | 5530.0(12)                                                                            |
| <i>Z</i>                                   | 4                                                                              | 4                                                                               | 4                                                                                     |
| $\rho_{\text{calc}}$ (g cm <sup>-3</sup> ) | 1.292                                                                          | 1.284                                                                           | 1.227                                                                                 |
| $\mu$ (mm <sup>-1</sup> )                  | 1.455                                                                          | 1.450                                                                           | 1.153                                                                                 |
| <i>F</i> <sub>000</sub>                    | 1808                                                                           | 1848                                                                            | 2184                                                                                  |
| $\theta$ (°)                               | 3.4450 - 20.4830                                                               | 3.150 - 27.266                                                                  | 2.22 - 23.43                                                                          |
| Goodness of fit                            | 1.055                                                                          | 1.014                                                                           | 1.049                                                                                 |
| <i>R</i> <sub>1</sub> (%)                  | 8.06                                                                           | 6.01                                                                            | 5.85                                                                                  |
| <i>wR</i> <sub>2</sub> (%)                 | 8.91                                                                           | 12.51                                                                           | 15.78                                                                                 |

**Table S1 continued.** Crystallographic and refinement parameters for compounds **1 - 5**

|                                            | [Y(OArF <sub>5</sub> ) <sub>2</sub> (Py) <sub>5</sub> ]<br>B(ArF <sub>5</sub> ) <sub>4</sub> ·0.5C <sub>6</sub> H <sub>14</sub><br><b>(4)</b> | [Y( <sup>t</sup> BuPO(NH <sup>i</sup> Pr) <sub>2</sub> ) <sub>2</sub><br>(H <sub>2</sub> O) <sub>5</sub> ][I] <sub>3</sub> ·H <sub>2</sub> O<br>·2( <sup>t</sup> BuPO(NH <sup>i</sup> Pr) <sub>2</sub> )<br><b>(5)</b> | [Gd( <sup>t</sup> BuPO(NH <sup>i</sup> Pr) <sub>2</sub> ) <sub>2</sub><br>(H <sub>2</sub> O) <sub>5</sub> ][I] <sub>3</sub> ·H <sub>2</sub> O<br>·2( <sup>t</sup> BuPO(NH <sup>i</sup> Pr) <sub>2</sub> )<br><b>(5b)</b> |
|--------------------------------------------|-----------------------------------------------------------------------------------------------------------------------------------------------|------------------------------------------------------------------------------------------------------------------------------------------------------------------------------------------------------------------------|--------------------------------------------------------------------------------------------------------------------------------------------------------------------------------------------------------------------------|
| Reference                                  | This work                                                                                                                                     | 3                                                                                                                                                                                                                      | This work                                                                                                                                                                                                                |
| Sum formula                                | YC <sub>64</sub> H <sub>32</sub> BF <sub>30</sub> N <sub>5</sub> O <sub>2</sub>                                                               | YC <sub>40</sub> H <sub>112</sub> I <sub>3</sub> N <sub>8</sub> O <sub>10</sub> P <sub>4</sub>                                                                                                                         | GdC <sub>40</sub> H <sub>112</sub> I <sub>3</sub> N <sub>8</sub> O <sub>10</sub> P <sub>4</sub>                                                                                                                          |
| Formula weight (g/mol)                     | 1572.7                                                                                                                                        | 1458.9                                                                                                                                                                                                                 | 1527.20                                                                                                                                                                                                                  |
| Crystal system                             | Triclinic                                                                                                                                     | Triclinic                                                                                                                                                                                                              | Triclinic                                                                                                                                                                                                                |
| Space group                                | <i>P</i> $\bar{1}$                                                                                                                            | <i>P</i> $\bar{1}$                                                                                                                                                                                                     | <i>P</i> $\bar{1}$                                                                                                                                                                                                       |
| <i>T</i> (K)                               | 150                                                                                                                                           | 120                                                                                                                                                                                                                    | 120                                                                                                                                                                                                                      |
| <i>a</i> (Å)                               | 11.9649(8)                                                                                                                                    | 13.7506(13)                                                                                                                                                                                                            | 13.7931(11)                                                                                                                                                                                                              |
| <i>b</i> (Å)                               | 14.5150(10)                                                                                                                                   | 14.727(2)                                                                                                                                                                                                              | 14.7302(9)                                                                                                                                                                                                               |
| <i>c</i> (Å)                               | 19.4283(16)                                                                                                                                   | 20.641(2)                                                                                                                                                                                                              | 20.712(2)                                                                                                                                                                                                                |
| $\alpha$ (°)                               | 73.514(7)                                                                                                                                     | 92.293(14)                                                                                                                                                                                                             | 92.658(17)                                                                                                                                                                                                               |
| $\beta$ (°)                                | 77.693(6)                                                                                                                                     | 108.245(10)                                                                                                                                                                                                            | 108.510(13)                                                                                                                                                                                                              |
| $\gamma$ (°)                               | 79.769(6)                                                                                                                                     | 114.902(8)                                                                                                                                                                                                             | 114.902(5)                                                                                                                                                                                                               |
| <i>V</i> (Å <sup>3</sup> )                 | 3136.3(4)                                                                                                                                     | 3528.3(7)                                                                                                                                                                                                              | 3539.3(6)                                                                                                                                                                                                                |
| <i>Z</i>                                   | 2                                                                                                                                             | 2                                                                                                                                                                                                                      | 2                                                                                                                                                                                                                        |
| $\rho_{\text{calc}}$ (g cm <sup>-3</sup> ) | 1.665                                                                                                                                         | 1.373                                                                                                                                                                                                                  | 1.433                                                                                                                                                                                                                    |
| $\mu$ (mm <sup>-1</sup> )                  | 1.069                                                                                                                                         | 2.275                                                                                                                                                                                                                  | 2.381                                                                                                                                                                                                                    |
| <i>F</i> <sub>000</sub>                    | 1562                                                                                                                                          | 1492                                                                                                                                                                                                                   | 1542                                                                                                                                                                                                                     |
| $\theta$ (°)                               | 2.712-28.961                                                                                                                                  | 2.205-25.250                                                                                                                                                                                                           | 2.659-25.250                                                                                                                                                                                                             |
| Goodness of fit                            | 1.064                                                                                                                                         | 1.060                                                                                                                                                                                                                  | 1.080                                                                                                                                                                                                                    |
| <i>R</i> <sub>1</sub> (%)                  | 9.36                                                                                                                                          | 3.36                                                                                                                                                                                                                   | 3.45                                                                                                                                                                                                                     |
| w <i>R</i> <sub>2</sub> (%)                | 22.89                                                                                                                                         | 7.62                                                                                                                                                                                                                   | 8.60                                                                                                                                                                                                                     |

**Table S2. Selected bond lengths (Å) and angles (°)**

|                                                      | 1 <sup>a</sup>    | 2 <sup>b</sup>      | 3 <sup>c</sup>        | 4 <sup>a</sup>        | 5 <sup>c</sup>      |
|------------------------------------------------------|-------------------|---------------------|-----------------------|-----------------------|---------------------|
| <b><i>Y-X bonds (axial)</i></b>                      |                   |                     |                       |                       |                     |
| Y1-Cl1                                               | 2.574(3)          | 2.5653(9)           | 2.6608(11)            |                       |                     |
| Y1-Cl2                                               | 2.576(3)          | 2.5675(9)           |                       |                       |                     |
| Y2-Cl3                                               |                   | 2.5842(9)           |                       |                       |                     |
| Y2-Cl4                                               |                   | 2.5649(10)          |                       |                       |                     |
| Y1-O1                                                |                   |                     | 2.042(3)              | 2.143(4)              | 2.206(2)            |
| Y1-O2                                                |                   |                     |                       | 2.150(4)              | 2.201(2)            |
| <b><i>Y - E bonds (equatorial)</i></b>               |                   |                     |                       |                       |                     |
| Y1-E1                                                | 2.514(7)          | 2.394(2)            |                       | 2.522(5)              |                     |
| Y1-E2                                                | 2.536(8)          | 2.387(2)            | 2.421(3)              | 2.506(5)              |                     |
| Y1-E3                                                | 2.506(9)          | 2.382(2)            | 2.414(3)              | 2.500(5)              |                     |
| Y1-E4                                                | 2.509(6)          | 2.382(2)            | 2.418(3)              | 2.523(5)              |                     |
| Y1-E5                                                | 2.516(8)          | 2.396(2)            | 2.412(3)              | 2.512(6)              | 2.3478(14)          |
| Y1-O6                                                |                   |                     | 2.390(3)              |                       | 2.3421(13)          |
| Y1-O7                                                |                   |                     |                       |                       | 2.3428(15)          |
| Y1-O8                                                |                   |                     |                       |                       | 2.355(2)            |
| Y1-O9                                                |                   |                     |                       |                       | 2.3465(18)          |
| Y2-O6                                                |                   | 2.391(2)            |                       |                       |                     |
| Y2-O7                                                |                   | 2.369(2)            |                       |                       |                     |
| Y2-O8                                                |                   | 2.411(2)            |                       |                       |                     |
| Y2-O9                                                |                   | 2.383(2)            |                       |                       |                     |
| Y2-O10                                               |                   | 2.368(2)            |                       |                       |                     |
| <b><i>X-Y-X angles (axial)</i></b>                   |                   |                     |                       |                       |                     |
| Cl1-Y1-Cl2                                           | 177.42(8)         | 176.43(3)           |                       |                       |                     |
| Cl3-Y2-Cl4                                           |                   | 179.61(3)           |                       |                       |                     |
| O1-Y1-Cl1                                            |                   |                     | 178.72(8)             |                       |                     |
| O1-Y1-O2                                             |                   |                     |                       | 178.59(17)            | 175.02(8)           |
| <b><i>Angles at Y involving equatorial atoms</i></b> |                   |                     |                       |                       |                     |
| Range nearest E-Y-E                                  | 69.7(2) - 74.1(3) | 71.47(8) - 72.46(8) | 71.43(10) - 72.82(10) | 70.94(16) - 73.67(18) | 70.57(7) - 73.37(9) |
| Range Cl-Y-E                                         | 88.0(2) - 93.0(2) | 86.36(6) - 94.68(6) | 83.91(7) - 89.16(7)   |                       |                     |
| Range O <sub>ax</sub> -Y-E <sub>eq</sub>             |                   |                     | 90.20(10) - 95.59(10) | 84.06(16) - 97.33(17) | 86.03(8) - 94.51(8) |

- a. E = N
- b. E = O; two molecules in the asymmetric unit
- c. E = O

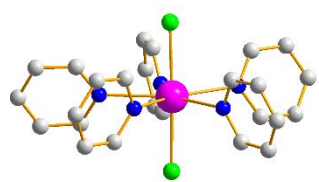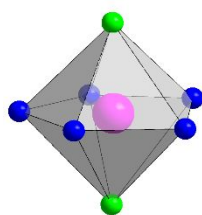

[GdCl<sub>2</sub>(Py)<sub>5</sub>]BPh<sub>4</sub>·THF (1)

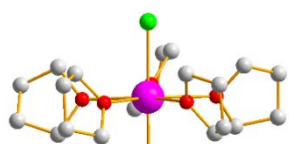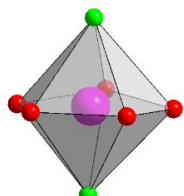

2[GdCl<sub>2</sub>(THF)<sub>5</sub>]2BPh<sub>4</sub>·THF (2)

Site 1

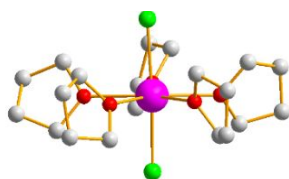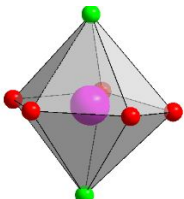

Site 2

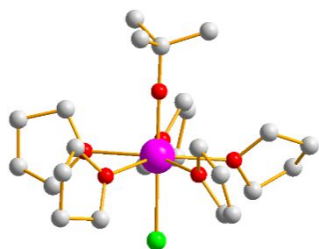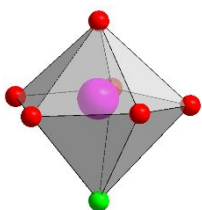

[Y(O<sup>t</sup>Bu)Cl(THF)<sub>5</sub>]BPh<sub>4</sub>·2THF (3)

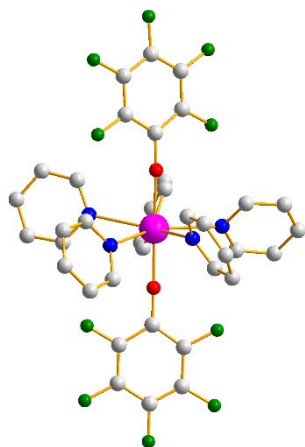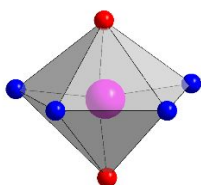

[Y(OArF<sub>5</sub>)<sub>2</sub>(Py)<sub>5</sub>]B(ArF<sub>5</sub>)<sub>4</sub>·0.5C<sub>6</sub>H<sub>14</sub> (4)

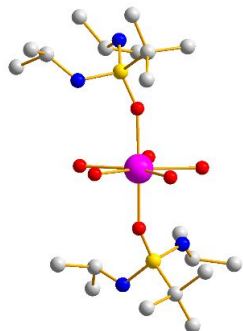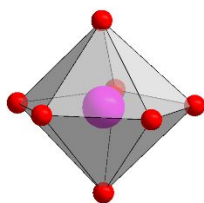

[Y('BuPO(NH'Pr)<sub>2</sub>)<sub>2</sub>(H<sub>2</sub>O)<sub>5</sub>][I]<sub>3</sub>·H<sub>2</sub>O·2('BuPO(NH'Pr)<sub>2</sub>) (5)

**Figure S1.** Solid state structures of the 5 complexes, excluding counterions and solvent. Colour code: Gd/Y=magenta, P=yellow, Cl=light green, F=dark green, O=red, N=Blue and C=grey. Hydrogen is not shown

## EPR spectroscopy

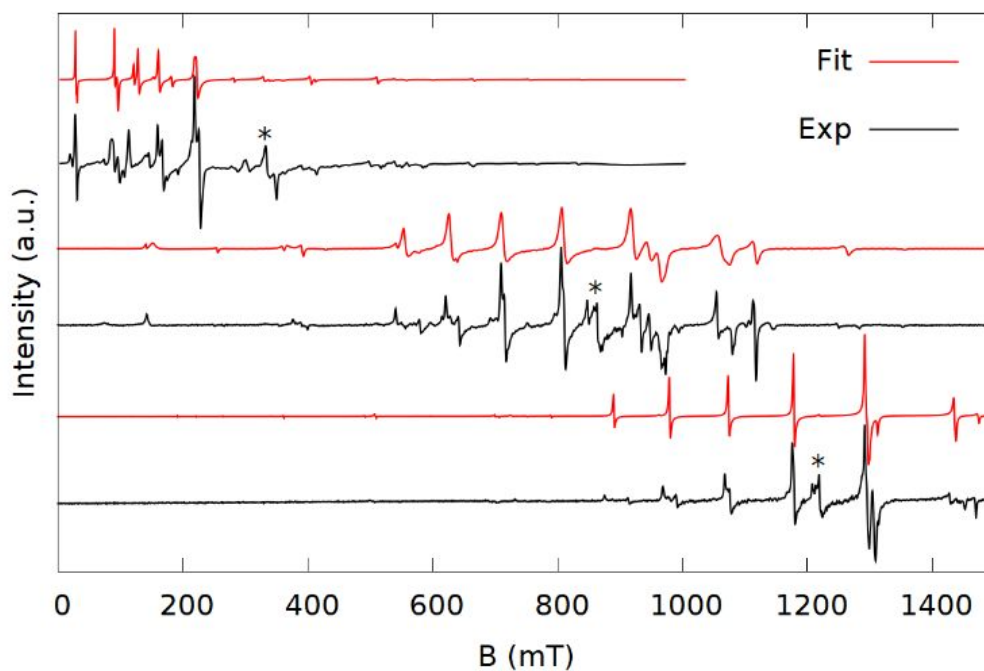

**Figure S2.** Spectra (black) and simulations (red) of **2** at X (top), K (middle) and Q-band (bottom). Fitted with the spin Hamiltonian of equation 1 without the  $B_2^2$  term (See manuscript for discussion).

**Table S3.** Best fit spin Hamiltonian parameters for **2** from fit of EPR spectra using spin Hamiltonian containing  $B_6^5$ . Numbers in parenthesis are estimated standard deviations of the last digit.

|          | $g_{\perp}$ | $g_{\parallel}$ | $B_2^0$<br>$10^{-2} \text{ cm}^{-1}$ | $B_4^0$<br>$10^{-5} \text{ cm}^{-1}$ | $B_6^5$<br>$10^{-5} \text{ cm}^{-1}$ |
|----------|-------------|-----------------|--------------------------------------|--------------------------------------|--------------------------------------|
| <b>2</b> | 1.9910(2)   | -               | 3.761(1)                             | -0.921.2(41)                         | 5.0(4)                               |

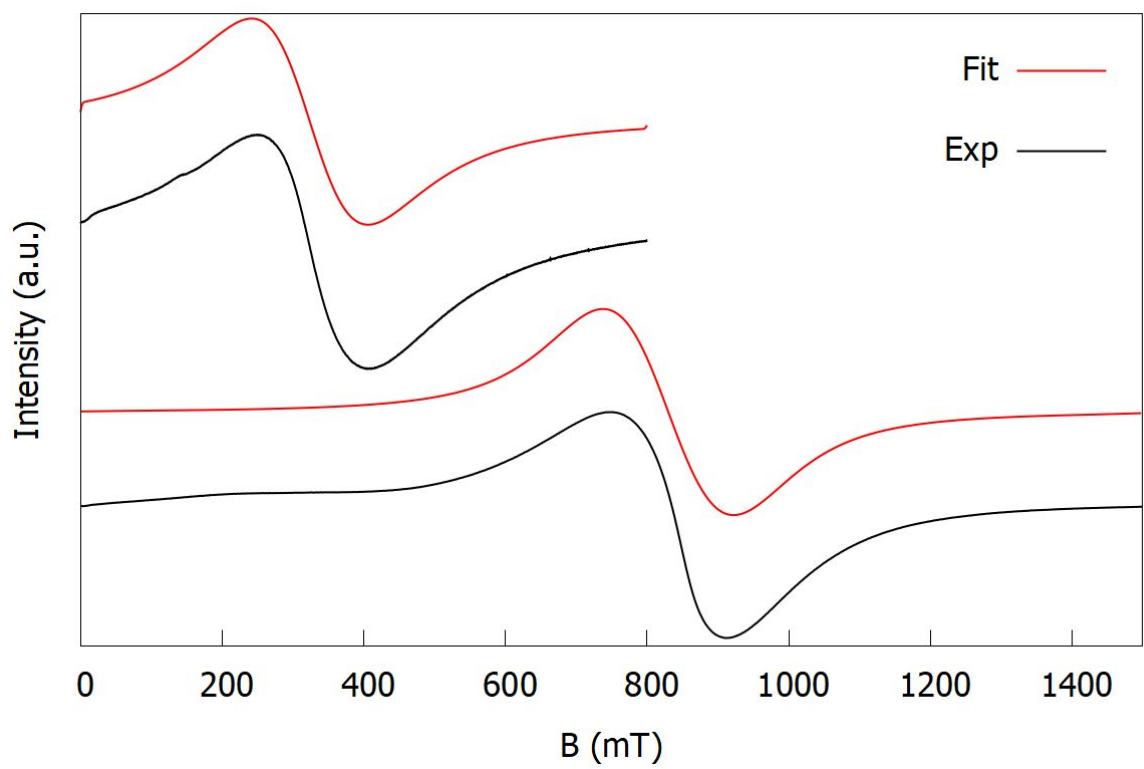

**Figure S3.** Spectra (black) and simulations (red) of neat  $\text{GdCl}_2(\text{THF})_5$  at X (top) and K (bottom). Simulated with  $S=1/2$ .

**Table S4.** Best fit spin Hamiltonian parameters for **5b** from fit of X- and Q-band EPR spectra. Numbers in parenthesis are estimated standard deviations of the last digit.

| <b>5</b> | $g_{\perp}$ | $g_{\parallel}$ | $B_2^0$<br>$10^{-2} \text{ cm}^{-1}$ | $B_4^0$<br>$10^{-5} \text{ cm}^{-1}$ | $B_6^0$<br>$10^{-7} \text{ cm}^{-1}$ | $B_6^5$<br>$10^{-5} \text{ cm}^{-1}$ | $\Delta E$<br>( $\text{cm}^{-1}$ ) | $B_6^5/\Delta E$<br>( $10^{-5}$ ) |
|----------|-------------|-----------------|--------------------------------------|--------------------------------------|--------------------------------------|--------------------------------------|------------------------------------|-----------------------------------|
| X-band   | 1.988(4)    | 1.997(7)        | 1.47(2)                              | -0.3(2)                              | -4(1)                                | 7.2(7)                               | 0.527                              | 14                                |
| Q-band*  | 1.989(3)*   | 1.995(6)*       | 1.6(1)                               | -3(1)                                | -4(5)                                | 6(2)                                 | 0.58                               | 10                                |

\*not field corrected



### Parameter conversion

In order to convert the  $P_k^q$  parameters obtained via the multi purpose EPR fitting program to the  $B_k^q$  parameters as originally defined by Stevens we used the relation.<sup>4,5</sup>

$$B_{q,Wybourne}^k = \frac{P_k^q}{2^k} \sqrt{\frac{(2S + k + 1)!}{(2S - k)!}}$$

Which results in parameters normalised in Wybourne's notation. These were then divided by the ratios listed in Table S4 to convert them to Stevens parameters.<sup>6</sup>

$$B_{k,Stevens}^q = \frac{B_{q,Wybourne}^k}{\lambda_{k,q}}$$

**Table S5.** Conversion factors between Stevens and Wybourne normalised parameters.

| k | q | $\lambda_{k,q}$         |
|---|---|-------------------------|
| 2 | 0 | 2                       |
| 2 | 2 | $\frac{2}{\sqrt{6}}$    |
| 4 | 0 | 8                       |
| 6 | 0 | 16                      |
| 6 | 5 | $\frac{-8}{3\sqrt{77}}$ |

## Ground state compositions

**Table S6.** Composition of the eigenstates of **1** in the  $m_s$  state basis.

| $m_s \backslash E(\text{cm}^{-1})$ | 0.000 | 0.000 | 0.227    | 0.227    | 0.671 | 0.671 | 1.308    | 1.308    |
|------------------------------------|-------|-------|----------|----------|-------|-------|----------|----------|
| -3.5                               |       |       | 0.00016  |          |       |       | 99.99984 |          |
| -2.5                               |       |       |          |          |       | 100   |          |          |
| -1.5                               |       |       |          | 99.99984 |       |       |          | 0.00016  |
| -0.5                               | 100   |       |          |          |       |       |          |          |
| 0.5                                |       | 100   |          |          |       |       |          |          |
| 1.5                                |       |       | 99.99984 |          |       |       | 0.00016  |          |
| 2.5                                |       |       |          |          | 100   |       |          |          |
| 3.5                                |       |       |          | 0.00016  |       |       |          | 99.99984 |

**Table S7.** Composition of the eigenstates of **2** in the  $m_s$  state basis.

| $m_s \backslash E(\text{cm}^{-1})$ | 0.000 | 0.000 | 0.234   | 0.234   | 0.693 | 0.693 | 1.356   | 1.356   |
|------------------------------------|-------|-------|---------|---------|-------|-------|---------|---------|
| -3.5                               |       |       | 0.0153  |         |       |       | 99.9847 |         |
| -2.5                               |       |       |         |         |       | 100   |         |         |
| -1.5                               |       |       |         | 99.9847 |       |       |         | 0.0153  |
| -0.5                               | 100   |       |         |         |       |       |         |         |
| 0.5                                |       | 100   |         |         |       |       |         |         |
| 1.5                                |       |       | 99.9847 |         |       |       | 0.0153  |         |
| 2.5                                |       |       |         |         | 100   |       |         |         |
| 3.5                                |       |       |         | 0.0153  |       |       |         | 99.9847 |

**Table S8.** Composition of the eigenstates of **2** in the  $m_s$  state basis using alternative spin-hamiltonian.

| $m_s \backslash E(\text{cm}^{-1})$ | 0.000    | 0.000    | 0.234    | 0.234    | 0.691    | 0.691   | 1.357    | 1.357   |
|------------------------------------|----------|----------|----------|----------|----------|---------|----------|---------|
| -3.5                               |          | 0.00001  |          | 0.00554  |          |         | 99.99444 |         |
| -2.5                               | 0.03139  |          | 0.00026  |          | 99.96833 | 0.00001 |          |         |
| -1.5                               | 0.00005  | 0.36631  |          | 99.62805 |          | 0.00003 | 0.00556  |         |
| -0.5                               | 99.58996 | 0.01228  | 0.36614  |          | 0.03163  |         |          |         |
| 0.5                                | 0.01228  | 99.58999 |          | 0.36614  |          | 0.03163 |          |         |
| 1.5                                | 0.36631  | 0.00005  | 99.62805 |          | 0.00003  |         |          | 0.00556 |

|     |         |         |         |         |         |          |  |              |
|-----|---------|---------|---------|---------|---------|----------|--|--------------|
| 2.5 |         | 0.03139 |         | 0.00026 | 0.00001 | 99.96833 |  |              |
| 3.5 | 0.00001 |         | 0.00554 |         |         |          |  | 99.9944<br>4 |

**Table S9.** Composition of the eigenstates of **3** in the  $m_s$  state basis.

|                                    |       |       |         |         |       |       |         |         |
|------------------------------------|-------|-------|---------|---------|-------|-------|---------|---------|
| $m_s \backslash E(\text{cm}^{-1})$ | 0.000 | 0.000 | 0.123   | 0.123   | 0.356 | 0.356 | 0.673   | 0.673   |
| -3.5                               |       |       | 0.0071  |         |       |       | 99.9929 |         |
| -2.5                               |       |       |         |         |       | 100   |         |         |
| -1.5                               |       |       |         | 99.9929 |       |       |         | 0.0071  |
| -0.5                               | 100   |       |         |         |       |       |         |         |
| 0.5                                |       | 100   |         |         |       |       |         |         |
| 1.5                                |       |       | 99.9929 |         |       |       | 0.0071  |         |
| 2.5                                |       |       |         |         | 100   |       |         |         |
| 3.5                                |       |       |         | 0.0071  |       |       |         | 99.9929 |

**Table S10.** Composition of the eigenstates of **4** in the  $m_s$  state basis.

|                                    |        |        |         |         |        |        |         |         |
|------------------------------------|--------|--------|---------|---------|--------|--------|---------|---------|
| $m_s \backslash E(\text{cm}^{-1})$ | 0.0000 | 0.0000 | 0.0551  | 0.0551  | 0.2078 | 0.2078 | 0.3611  | 0.3611  |
| -3.5                               |        |        | 0.4964  |         |        |        | 99.5036 |         |
| -2.5                               |        |        |         |         | 100    |        |         |         |
| -1.5                               |        |        |         | 99.5036 |        |        |         | 0.4964  |
| -0.5                               | 100    |        |         |         |        |        |         |         |
| 0.5                                |        | 100    |         |         |        |        |         |         |
| 1.5                                |        |        | 99.5036 |         |        |        | 0.4964  |         |
| 2.5                                |        |        |         |         |        | 100    |         |         |
| 3.5                                |        |        |         | 0.4964  |        |        |         | 99.5036 |

**Table S2.** Composition of the eigenstates of **5b** in the  $m_s$  state basis.

|                                    |       |       |         |         |       |       |         |        |
|------------------------------------|-------|-------|---------|---------|-------|-------|---------|--------|
| $m_s \backslash E(\text{cm}^{-1})$ | 0.000 | 0.000 | 0.106   | 0.106   | 0.323 | 0.323 | 0.568   | 0.568  |
| -3.5                               |       |       | 0.1624  |         |       |       | 99.8376 |        |
| -2.5                               |       |       |         |         |       | 100   |         |        |
| -1.5                               |       |       |         | 99.8376 |       |       |         | 0.1624 |
| -0.5                               |       | 100   |         |         |       |       |         |        |
| 0.5                                | 100   |       |         |         |       |       |         |        |
| 1.5                                |       |       | 99.8376 |         |       |       | 0.1624  |        |
| 2.5                                |       |       |         |         | 100   |       |         |        |

|     |  |  |  |        |  |  |  |         |
|-----|--|--|--|--------|--|--|--|---------|
| 3.5 |  |  |  | 0.1624 |  |  |  | 99.8376 |
|-----|--|--|--|--------|--|--|--|---------|

## References

- (1) Ding, Y.-S.; Yu, K.-X.; Reta, D.; Ortu, F.; Winpenny, R. E. P.; Zheng, Y.-Z.; Chilton, N. F. Field- and Temperature-Dependent Quantum Tunnelling of the Magnetisation in a Large Barrier Single-Molecule Magnet. *Nat. Commun.* **2018**, *9* (1), 3134. <https://doi.org/10.1038/s41467-018-05587-6>.
- (2) Evans, W. J.; Olofson, J. M.; Ziller, J. W. Synthesis and Structure of the Cationic Tert-Butoxide Complexes  $Y_3(OR)_7Cl(THF)_3^+$ ,  $Y_2(OR)_4Cl(THF)_4^+$ , and  $Y(OR)Cl(THF)_5^+$ : Representatives of a New Class of Yttrium Alkoxides. *J. Am. Chem. Soc.* **1990**, *112* (6), 2308–2314. <https://doi.org/10.1021/ja00162a035>.
- (3) Gupta, S. K.; Rajeshkumar, T.; Rajaraman, G.; Murugavel, R. An Air-Stable Dy(III) Single-Ion Magnet with High Anisotropy Barrier and Blocking Temperature. *Chem. Sci.* **2016**, *7* (8), 5181–5191. <https://doi.org/10.1039/C6SC00279J>.
- (4) Rudowicz, C.; Chung, C. Y. The Generalization of the Extended Stevens Operators to Higher Ranks and Spins, and a Systematic Review of the Tables of the Tensor Operators and Their Matrix Elements. *J. Phys. Condens. Matter* **2004**, *16* (32), 5825–5847. <https://doi.org/10.1088/0953-8984/16/32/018>.
- (5) D Smith; J H M Thornley. The Use of 'operator Equivalents'. *Proc. Phys. Soc.* **1966**, *89* (4), 779. <https://doi.org/10.1088/0370-1328/89/4/301>.
- (6) Newman, D. J.; Betty, N. G. Empirical Crystal Fields. In *Crystal Field Handbook*; Cambridge University Press, 2000. <https://doi.org/10.1017/CBO9780511524295>.
